# Supplementary material for: Oxidation state selective sorption behavior of plutonium using N,N-dialkylamide functionalized carbon nanotubes: experimental study and DFT calculation
Source: Royal Society of Chemistry journal article supplement (doi:10.1039/c6ra17773e), 2016-01-01
Supplement: c6ra17773e1.pdf [file c6ra17773e1.pdf]

### Supplementary information

Supplementary Table 1: Specifications and operating conditions of ICP-AES.

| <b>Instrumental specification</b> |                                                    |
|-----------------------------------|----------------------------------------------------|
| Optical design                    | Paschen-Runge mounting, Circular design            |
| Focal length                      | 750 mm                                             |
| Grating                           | Holographic                                        |
| Groove density                    | 1800 grooves/mm (1), 3600 grooves/mm (2)           |
| Wave length range                 | 130-800 nm                                         |
| Entrance slit width               | 15 microns                                         |
| Resolution (FWHM)                 | 0.01 nm from 130-450 nm<br>0.02 nm from 450-800 nm |
| Thermal regulation                | Controlled to $30 \pm 1^\circ\text{C}$             |
| Frequency                         | 27.12 MHz                                          |
| Pump                              | Dual channel peristaltic pump                      |
| Detector                          | Linear arrays of CCD (3648 pixels/array)           |
| Nebulizer                         | Cross flow                                         |
| ICP-torch                         | Demountable, radial viewing                        |
| <b>Operating condition</b>        |                                                    |
| Coolant flow                      | 16 L/min                                           |
| Auxiliary flow                    | 0.5 L/min                                          |
| Total time of measurement         | 26 s                                               |
| Pump speed                        | 28 Rpm                                             |
| RF power out put                  | 1.1 kW                                             |
| Input power                       | 230 V AC                                           |

## Supplementary information on Isotherm models

### *Langmuir isotherm*

The Langmuir model is the most widely used model which explains sorption by assuming an ideal gas behaviour of sorbate on the sorbent at isothermal conditions. The main assumptions involved are (i) all sites are equivalent (ii) the adsorbing surface possess homogeneity (iii) monolayer coverage i.e., each molecule can hold at most one molecule of adsorbate (iv) there exists dynamic equilibrium between the adsorbed and free adsorbate molecules (v) there are no interactions between adsorbate molecules on neighbouring sites [1]. It can be expressed as:

$$\frac{C_e}{q_e} = \frac{1}{q_0 b} + \frac{C_e}{q_0} \quad (1)$$

where,  $C_e$  – the equilibrium concentration of the  $\text{Pu}^{4+}$  or  $\text{PuO}_2^{2+}$  ion,  $q_e$  – the amount of metal ion adsorbed on AFMWCNT at equilibrium,  $q_0$  – the sorption capacity of AFMWCNT for  $\text{Pu}^{4+}$  or  $\text{PuO}_2^{2+}$  ion and  $b$  is the sorption energy.

### *Dubinin–Radushkevich (D–R) isotherm*

The Dubinin- Radushkevich isotherm is widely used for describing sorption of subcritical fluids in microporous solids such as activated carbon and Zeolites, originally was based on the Polanyi potential theory of adsorption. This model is based on the assumptions of a change in potential energy between the adsorbate and the adsorbed phases and a characteristic energy of a given solid [2]. It can be expressed as

$$\ln q_e = \ln X_m - \beta \varepsilon^2 \quad (2)$$

where,  $q_e$  – the amount of Pu ion adsorbed on the AFMWCNT at equilibrium,  $X_m$  – the maximum sorption capacity and  $\beta$  – the activity constant. The Polanyi potential,  $\varepsilon$  can be evaluated by

$$\varepsilon = RT \ln(1 + 1/C_e) \quad (3)$$

where, R– the universal gas constant (8.314 J mol<sup>-1</sup> K<sup>-1</sup>), T- the absolute temperature and C<sub>e</sub>– the equilibrium concentration of Pu ion. The energy (E) can be determined from β, slope of the ln q<sub>e</sub> vs. ε<sup>2</sup> plot, expressed as

$$E = 1/(-2\beta)^{1/2} \quad (4)$$

#### *Freundlich isotherm*

Freundlich adsorption isotherm is an empirical relation between the concentrations of a solute on the surface of an adsorbent to the concentration of the solute in the liquid. This adsorption model is based on the following assumptions (i) the surface containing the adsorbing sites is heterogeneous (ii) possibility of multi-layer adsorption (iii) the active sites are non-uniform. The following equation holds good at low pressure

$$Q_e = K_f C_e^{1/n} \quad (5)$$

where, Q<sub>e</sub> – the amount of plutonium ions adsorbed per gram of the AFMWCNT at equilibrium condition (mg g<sup>-1</sup>), K<sub>f</sub> – Freundlich isotherm constant (mg g<sup>-1</sup>), C<sub>e</sub> – the equilibrium concentration of plutonium (mg L<sup>-1</sup>) and n – sorption intensity.

On linearization of equation, we have

$$\log Q_e = \log K_f + 1/n \log C_e \quad (6)$$

The constant K<sub>f</sub> indicates the adsorption capacity, whereas the 1/n is a function of the strength of adsorption. If ‘n’ is unity, then the partition of metal ions between the solid phase and liquid phase are independent of the concentration of metal ion. ‘n’ value above unity indicates the normal sorption and ‘n’ value less than one implies that the sorption process is cooperative [3]. As the temperature increases, change in the constants K<sub>f</sub> and n values indicate that the quantity adsorbed rises more slowly and higher pressure are required for saturation.

#### *Temkin isotherm*

This model approach relies on the assumption that by ignoring the extremely low and high value of concentrations, the heat of adsorption (function of temperature) decreases linearly rather than

logarithm with increasing coverage. Parameters involved in Temkin isotherm model can be evaluated from the slope and intercept of  $q_e$  against  $\ln C_e$  plot [4]. The model can be quantitatively expressed as

$$q_e = \frac{RT}{b} \ln (A_T C_e) \quad (7)$$

$$q_e = \frac{RT}{b} \ln A_T + \frac{RT}{b} \ln C_e \quad (8)$$

where,  $A_T$  – Temkin isotherm equilibrium binding constant ( $L g^{-1}$ ),  $b$  – Temkin isotherm constant,  $R$  – universal gas constant ( $8.314 J mol^{-1} K^{-1}$ ) and  $T$  – absolute temperature.

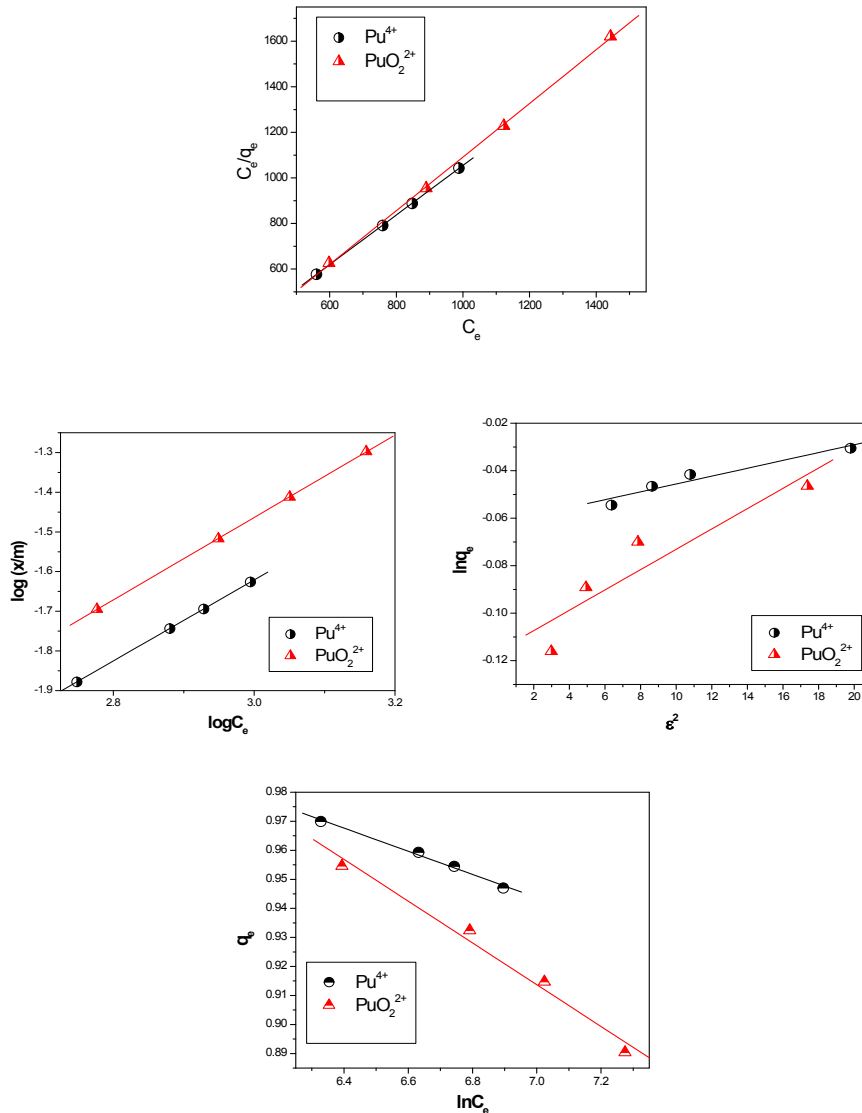

**Supplementary Fig. 1:** Langmuir, Freundlich, D–R and Temkin isotherms for  $Pu^{4+}$  and  $PuO_2^{2+}$  on AFMWCNT

**References:**

1. A.O. Dada, A.P. Olalekan, A.M. Olatunya and O. DADA, IOSR J. Appl. Chem., 2012, **3 (1)**, 38–45.
2. C. Nguyen, D.D. Do, Carbon, 2001, **39 (9)**, 1327–1336.
3. S. Mohan and J. Karthikeyan, Environ Pollut. 1997, **97(1-2)**, 183–187.
4. A.P. Olalekan, A. O. Dada and A.O. Okewale, Res. J. Chem. Env. Sci., 2013, **1 (5)**, 22–27.
